# Supplementary material for: Cr3X4 (X = Se, Te) monolayers as a new platform to realize robust spin filters, spin diodes and spin valves
Source: Royal Society of Chemistry journal article supplement (doi:10.1039/d2cp03615k), 2022-01-01
Supplement: d2cp03615k1.pdf [file d2cp03615k1.pdf]

## Supporting information

for

### **Cr<sub>3</sub>X<sub>4</sub> (X=Se, Te) monolayers as new platform to realize robust spin filter, spin diode and spin valve**

Qihong Wu,<sup>a</sup> Rongkun Liu,<sup>a</sup> Zhanjun Qiu,<sup>a</sup> Dengfeng Li,<sup>a</sup> Jie Li,<sup>b</sup> Xiaotian Wang\*<sup>c</sup> and  
Guangqian Ding\*<sup>a</sup>

<sup>a</sup>*School of Science, Chongqing University of Posts and Telecommunications, Chongqing 400065,  
China.*

<sup>b</sup>*Key Laboratory for the Physics and Chemistry of Nanodevices, School of Electronics, Peking  
University, Beijing 100871, China.*

<sup>c</sup>*School of Physical Science and Technology, Southwest University, Chongqing, 400715, China.*

Corresponding authors: Xiaotian Wang

E-mail: [xiaotianwang@swu.edu.cn](mailto:xiaotianwang@swu.edu.cn);

Guangqian Ding

E-mail: [dinggq@cqupt.edu.cn](mailto:dinggq@cqupt.edu.cn);

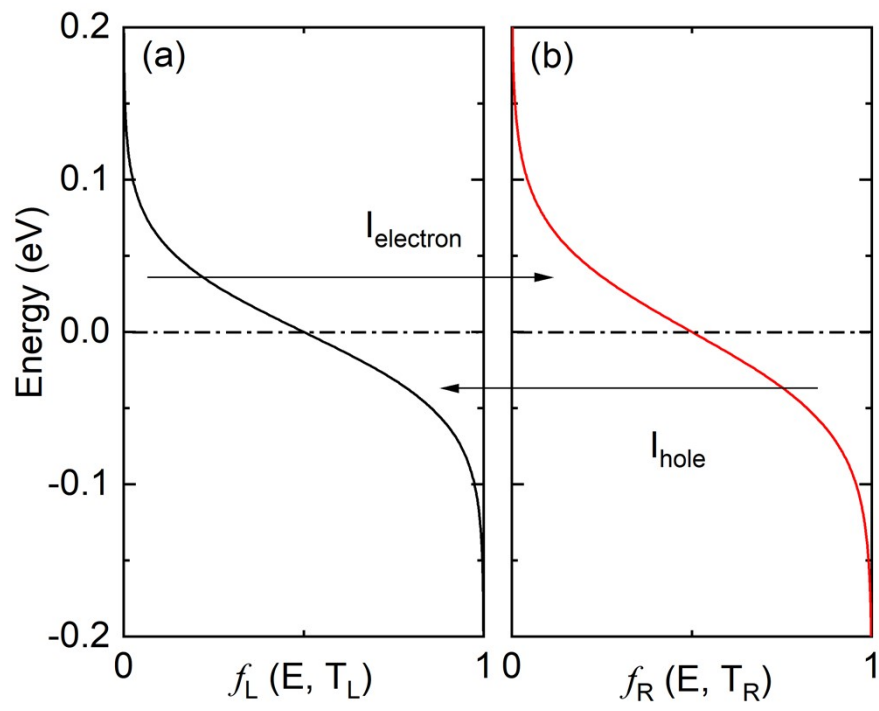

**Fig. S1.** The Fermi distribution of left and right electrodes.

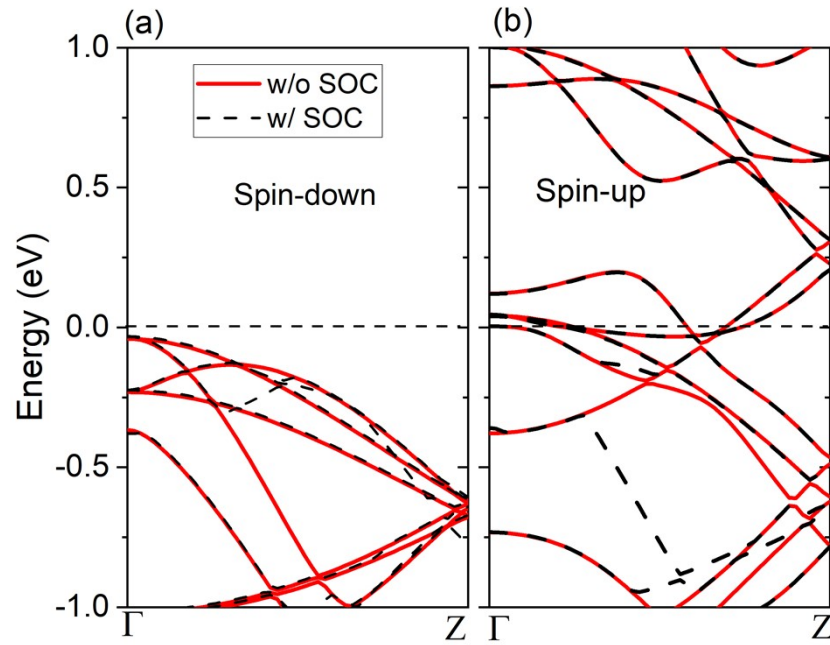

**Fig. S2.** Calculated band structure of monolayer Cr<sub>3</sub>Te<sub>4</sub> within and without SOC effect, (a) and (b) represent the spin down and spin up band structure, respectively.
